# Supplementary material for: Monotherapy with Metformin versus Sulfonylureas and Risk of Cancer in Type 2 Diabetic Patients: A Systematic Review and Meta-Analysis
Source: J Diabetes Res. 2019 Nov 19;2019:7676909. doi: 10.1155/2019/7676909 (PMC6885827; doi:10.1155/2019/7676909)
Supplement: Supplementary Materials — PRISMA checklist.doc and Quality assessments of the included studies.doc. [file 7676909.f1.zip]

Archive with 2 entries (2 files):
- PRISMA  checklist.doc
- Quality assessments of the included studies.doc
